# Supplementary material
Source: publisher figshare collection journal article supplement (https://asha.figshare.com/articles/dataset/_/24520624)
Supplement: Supplementary file 1 [file 1]

## Supplemental Material S5. Committee review.

### Expert Name:

| Original Version                                                                                           | Back Translation                                                                                               | Turkish Version                                                                                                               | Expert Comments |
|------------------------------------------------------------------------------------------------------------|----------------------------------------------------------------------------------------------------------------|-------------------------------------------------------------------------------------------------------------------------------|-----------------|
| Emotional Communication in Hearing Questionnaire (EMO-CHeQ)                                                | Emotional Communication in Hearing Questionnaire (EMO-CHeQ)                                                    | İşitmede Duygusal İletişim Ölçeği (İDİ-Ö)                                                                                     |                 |
| Please read the following items and indicate your level of agreement with each statement.                  | Please read the sentences below and indicate your agreement for each statement.                                | Lütfen aşağıdaki cümleleri okuyun ve her madde için katılma durumunuzu belirtin.                                              |                 |
| 1.I have difficulty identifying the emotions expressed by people I interact with on a regular basis.       | 1.I find it difficult to identify the emotions expressed by the people that I interact regularly.              | 1. Günlük hayatta iletişim kurduğum insanların ifade ettiği duyguları tanımlamakta zorluk yaşıyorum.                          |                 |
| 2.I have difficulty understanding emotions expressed in speech by men.                                     | 2. I find it difficult to understand the emotions expressed in men's speech.                                   | 2. Erkeklerin konuşma esnasında ifade ettiği duyguları anlamakta zorluk yaşıyorum.                                            |                 |
| 3.I have difficulty understanding emotions expressed in speech by women.                                   | 3.I find it difficult to understand the emotions expressed in women's speech.                                  | 3. Kadınların konuşma esnasında ifade ettikleri duyguları anlamakta zorluk yaşıyorum.                                         |                 |
| 4.I find it difficult to identify the emotions of people speaking on television.                           | 4.I have difficulty identifying the emotions expressed by the people who are speaking on television.           | 4. Televizyonda konuşan insanların ifade ettiği duyguları tanımlamakta zorlanıyorum.                                          |                 |
| 5.I have difficulty understanding emotions expressed in speech by young adults.                            | 5. I find it difficult to understand the emotions expressed in young adult's speech.                           | 5. Genç yetişkinlerin konuşma esnasında ifade ettikleri duyguları anlamakta güçlük çekirim.                                   |                 |
| 6.I find that people misinterpret my emotions (e.g. others think I am angry when I am not angry).          | 6. I observe that people misinterpret my emotions (e.g. people think that I am angry when I am not angry).     | 6. İnsanların duygularımı yanlış yorumladıklarını gözlemliyorum (Ör.sinirli olmadığımında insanlar sinirli olduğumu düşünür). |                 |
| 7.I find that it is difficult to monitor the way my emotions come across in my speech.                     | 7. I find it difficult to control the way my emotions are expressed during my speech.                          | 7. Konuşmam sırasında duygularımın ifade ediliş tarzını kontrol etmenin güç olduğunu düşünüyorum.                             |                 |
| 8.I find it difficult to convey my emotions about a subject in a subtle manner using the tone of my voice. | 8. I have difficulty conveying my emotions on a topic in a subtle manner using the tone of my voice.           | 8. Bir konu hakkında hissettiğim duyguları ses tonumu ayarlayarak uygun bir şekilde ifade etmekte zorlanıyorum.               |                 |
| 9.I find that it is difficult to express my emotions about a topic out loud using the tone of my voice.    | 9. I have difficulty conveying my emotions on a topic with high voice using the tone of my voice.              | 9.Sesimin tonunu kullanarak bir konu hakkındaki duygularımı yüksek sesle ifade etmenin güç olduğunu düşünüyorum.              |                 |
| 10. It is harder for me to identify the emotions expressed by others when I'm in a noisy environment.      | 10. It is more difficult for me to identify the emotions expressed by others when I am in a noisy environment. | 10.Gürültülü bir ortamda bulunduğumda başkalarının ifade ettiği duyguları tanımlamak benim için daha zordur.                  |                 |
| 11.I find it challenging to identify emotions expressed by others when there is                            | 11. I find it difficult to describe the emotions expressed by others when                                      | 11.Aynı anda başka birisi konuşurken, diğerlerinin ifade ettiği duyguları tanımlamak konusunda güçlük yaşıyorum.              |                 |

|                                                                                                                        |                                                                                                                                              |                                                                                                                                     |  |
|------------------------------------------------------------------------------------------------------------------------|----------------------------------------------------------------------------------------------------------------------------------------------|-------------------------------------------------------------------------------------------------------------------------------------|--|
| someone else talking at the same time.                                                                                 | there is someone else talking at the same time.                                                                                              |                                                                                                                                     |  |
| 12.Difficulties identifying emotions in speech make me feel left out when in groups.                                   | 12. The difficulties identifying the emotions in the speech causes me to feel excluded in groups.                                            | 12.Konuşmadaki duyguları tanımlamada yaşadığım zorluklar grup ortamında kendimi dışlanmış hissetmeme sebep olur.                    |  |
| 13.Difficulty identifying emotions expressed in speech causes me to feel uncomfortable when talking to friends.        | 13. The difficulty of identifying the emotions expressed in the speech causes me to feel uncomfortable during conversations with my friends. | 13.Konuşmada ifade edilen duyguları tanımlama güçlüğü, arkadaşlarımla konuşurken kendimi rahatsız hissetmeme sebep olur.            |  |
| 14.Difficulties identifying emotions expressed in speech cause me to feel sad.                                         | 14. The difficulty of describing the emotions expressed in the speech causes me to feel sad.                                                 | 14.Konuşmada ifade edilen duyguları tanımlamadaki zorluklar kendimi üzgün hissetmeme sebep olur.                                    |  |
| 15.Difficulties understanding emotions expressed in speech cause me to feel frustrated.                                | 15. Difficulties in understanding the emotions expressed in speech make me feel frustrated.                                                  | 15.Konuşmada ifade edilen duyguları tanımlamadaki zorluklar kendimi engellenmiş hissetmeme sebep olur.                              |  |
| 16.My difficulty identifying emotions expressed in speech negatively affects my relationships with friends and family. | 16. The trouble I have identifying the emotions in the speech affects my relationships with my friends and family badly.                     | 16.Konuşmada ifade edilen duyguları tanımlama konusunda yaşadığım güçlük arkadaşlarım ve ailemle olan ilişkilerimi olumsuz etkiler. |  |
