# Supplementary material
Source: publisher figshare collection journal article supplement (https://asha.figshare.com/articles/dataset/_/24520624)
Supplement: Supplementary file 2 [file 1]

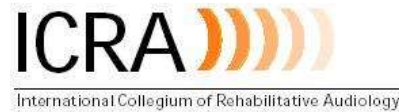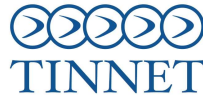

**Supplemental Material S1.** The ICRA/TINNET checklist.

Preferred reporting items for hearing-related questionnaires that have been translated and adapted for use in different languages and cultures

| Item No                                              | Preferred reporting item                                                                                                                                                                                     | Reported on page #                                                                                                                      |
|------------------------------------------------------|--------------------------------------------------------------------------------------------------------------------------------------------------------------------------------------------------------------|-----------------------------------------------------------------------------------------------------------------------------------------|
| <b>Preparation for translating a questionnaire</b>   |                                                                                                                                                                                                              |                                                                                                                                         |
| 1a                                                   | Identify whether a target language version already exists, who did the development, whether it has certification documenting the process, and how it is intended to be used                                  | Stated in the manuscript, page 2–3                                                                                                      |
| 1b                                                   | Explore permission to use and translate the questionnaire, and requirements needed for gaining approval of the translated version                                                                            | Stated in the manuscript, page 3                                                                                                        |
| 1c                                                   | Invite the source-language Questionnaire Developer to be involved                                                                                                                                            | We asked the expert who developed the scale if he wanted to participate in our study, but unfortunately, we did not receive any answer. |
| 1d                                                   | Set out the key objectives for the process to follow, customized to the end users                                                                                                                            | Stated in the manuscript, page 3                                                                                                        |
| 1e                                                   | Create templates for documenting the translation and adaptation process                                                                                                                                      | Sent in attachment                                                                                                                      |
| 1f                                                   | Develop definition of concepts for each questionnaire item                                                                                                                                                   | Sent in attachment                                                                                                                      |
| <b>The translation process – forward translation</b> |                                                                                                                                                                                                              |                                                                                                                                         |
| 2a                                                   | Recruit at least two dual-language translators whose mother tongue is the target language and who are in-country residents wherever possible, with a dialect that is representative of the target population | Stated in the manuscript, page 3                                                                                                        |
| 2b                                                   | Brief the translators on the instrument, clinical concepts underlying the health condition of interest and the concept definitions for each questionnaire item                                               | Stated in the manuscript, page 3                                                                                                        |



|                                                   |                                                                                                                                                                                                                                                            |                                                                 |
|---------------------------------------------------|------------------------------------------------------------------------------------------------------------------------------------------------------------------------------------------------------------------------------------------------------------|-----------------------------------------------------------------|
| 2c                                                | Instruct translators on the requirements of the translation (i.e. equivalence, accessibility, and acceptability of wording) and preferred terminology                                                                                                      | Stated in the manuscript, page 3                                |
| 2d                                                | Working independently, each translator produces a written record of forward translation                                                                                                                                                                    | Both translators translated the scale into Turkish and sent it. |
| 2e                                                | Reconcile the forward translations to create a single forward translation; producing one written record with comments, when needed                                                                                                                         | Stated in the manuscript, page 3                                |
| <b>The translation process – back translation</b> |                                                                                                                                                                                                                                                            |                                                                 |
| 3a                                                | Recruit at least one new dual-language translator who is an in-country resident with experience of the target culture and whose mother tongue is the target language                                                                                       | Stated in the manuscript, page 3                                |
| 3b                                                | Working independently, each translator produces a written record of back translation                                                                                                                                                                       | Translator translated the scale into English and sent it.       |
| 3c                                                | Review the back translations against the source language                                                                                                                                                                                                   | Translation checked                                             |
| <b>Committee review</b>                           |                                                                                                                                                                                                                                                            |                                                                 |
| 4a                                                | Appoint a multi-disciplinary committee that includes at least one bilingual member (preferably a linguist) whose mother tongue is the target language and who are in-country residents with experience of the target culture and a healthcare professional | Stated in the manuscript, page 3                                |
| 4b                                                | Review the translation report which includes the forward and back-translations of the questionnaire, the instructions and response                                                                                                                         | Stated in the manuscript, page 3                                |



|                                            |                                                                                                                                                                                                                       |                                                                                                                                     |
|--------------------------------------------|-----------------------------------------------------------------------------------------------------------------------------------------------------------------------------------------------------------------------|-------------------------------------------------------------------------------------------------------------------------------------|
|                                            | scale with each other and with the source, and review the previously identified conceptually problematic items. Share translation solutions, and refer difficult items to the source-language Questionnaire Developer |                                                                                                                                     |
| <b>Field testing</b>                       |                                                                                                                                                                                                                       |                                                                                                                                     |
| 5a                                         | Recruit a small sample of patients from the target population                                                                                                                                                         | Stated in the manuscript, page 3                                                                                                    |
| 5b                                         | Assess whether the new version meets the requirements (i.e. equivalence, accessibility, and acceptability of wording) and preferred terminology                                                                       | Stated in the manuscript, page 3                                                                                                    |
| <b>Review and finalize the translation</b> |                                                                                                                                                                                                                       |                                                                                                                                     |
| 6a                                         | Review the results of the field testing and finalize the translation                                                                                                                                                  | Stated in the manuscript, page 3                                                                                                    |
| 6b                                         | Grammar review, formatting and proofreading of the finalized translation                                                                                                                                              | Stated in the manuscript, page 3                                                                                                    |
| 6c                                         | Submit all reports and other relevant documentation to the source-language Questionnaire Developer, and request for approval if applicable                                                                            | We sent the scale and the reports on the study to the scale owner. We made improvements based on the comments we received from him. |
| 6d                                         | Finalize and archive a report                                                                                                                                                                                         | Finalized and archived                                                                                                              |
