# Supplementary material
Source: publisher figshare collection journal article supplement (https://asha.figshare.com/articles/dataset/_/24520624)
Supplement: Supplementary file 3 [file 1]

#### Supplemental Material S4. Back translation.

Name:

*Please translate the following expressions into Turkish and write any special notes you want to specify.*

*Lütfen aşağıdaki ifadeleri İngilizce'ye çevirin ve belirtmek istediğiniz özel notları yazın.*

| Turkish Version                                                                                                               | English Version | Yazarlara Not/ Special Notes to Authors |
|-------------------------------------------------------------------------------------------------------------------------------|-----------------|-----------------------------------------|
| İşitmede Duygusal İletişim Ölçeği (İDİ-Ö)                                                                                     |                 |                                         |
| Lütfen aşağıdaki cümleleri okuyun ve her madde için katılma durumunuzu belirtin.                                              |                 |                                         |
| 1. Günlük hayatta iletişim kurduğum insanların ifade ettiği duyguları tanımlamakta zorluk yaşıyorum.                          |                 |                                         |
| 2. Erkeklerin konuşma esnasında ifade ettiği duyguları anlamakta zorluk yaşıyorum.                                            |                 |                                         |
| 3. Kadınların konuşma esnasında ifade ettikleri duyguları anlamakta zorluk yaşıyorum.                                         |                 |                                         |
| 4. Televizyonda konuşan insanların ifade ettiği duyguları tanımlamakta zorlanıyorum.                                          |                 |                                         |
| 5. Genç yetişkinlerin konuşma esnasında ifade ettikleri duyguları anlamakta güçlük çekerim.                                   |                 |                                         |
| 6. İnsanların duygularımı yanlış yorumladıklarını gözlemliyorum (Ör.sinirli olmadığımında insanlar sinirli olduğumu düşünür). |                 |                                         |
| 7. Konuşmam sırasında duygularımın ifade ediliş tarzını kontrol etmenin güç olduğunu düşünüyorum.                             |                 |                                         |
| 8. Bir konu hakkında hissettiğim duyguları ses tonumu ayarlayarak uygun bir şekilde ifade etmekte zorlanıyorum.               |                 |                                         |
| 9. Sesimin tonunu kullanarak bir konu hakkındaki duygularımı yüksek sesle ifade etmenin güç olduğunu düşünüyorum.             |                 |                                         |

|                                                                                                                                      |  |  |
|--------------------------------------------------------------------------------------------------------------------------------------|--|--|
| 10. Gürültülü bir ortamda bulunduğumda başkalarının ifade ettiği duyguları tanımlamak benim için daha zordur.                        |  |  |
| 11. Aynı anda başka birisi konuşurken, diğerlerinin ifade ettiği duyguları tanımlamak konusunda güçlük yaşıyorum.                    |  |  |
| 12. Konuşmadaki duyguları tanımlamada yaşadığım zorluklar grup ortamında kendimi dışlanmış hissetmeme sebep olur.                    |  |  |
| 13. Konuşmada ifade edilen duyguları tanımlama güçlüğü, arkadaşlarımla konuşurken kendimi rahatsız hissetmeme sebep olur.            |  |  |
| 14. Konuşmada ifade edilen duyguları tanımlamadaki zorluklar kendimi üzgün hissetmeme sebep olur.                                    |  |  |
| 15. Konuşmada ifade edilen duyguları tanımlamadaki zorluklar kendimi engellenmiş hissetmeme sebep olur.                              |  |  |
| 16. Konuşmada ifade edilen duyguları tanımlama konusunda yaşadığım güçlük arkadaşlarım ve ailemle olan ilişkilerimi olumsuz etkiler. |  |  |
