# Supplementary material
Source: publisher figshare collection journal article supplement (https://asha.figshare.com/articles/dataset/_/24520624)
Supplement: Supplementary file 4 [file 1]

## Supplemental Material S2. Forward translation.

Name:

*Please translate the following expressions into Turkish and write any special notes you want to specify.*

*Lütfen aşağıdaki ifadeleri İngilizce'ye çevirin ve belirtmek istediğiniz özel notları yazın.*

| Original Version                                                                                      | Turkish Version | Yazarlara Not/Special Notes to Authors |
|-------------------------------------------------------------------------------------------------------|-----------------|----------------------------------------|
| Emotional Communication in Hearing Questionnaire (EMO-CHeQ)                                           |                 |                                        |
| Please read the following items and indicate your level of agreement with each statement.             |                 |                                        |
| 1. I have difficulty identifying the emotions expressed by people I interact with on a regular basis. |                 |                                        |
| 2. I have difficulty understanding emotions expressed in speech by men.                               |                 |                                        |
| 3. I have difficulty understanding emotions expressed in speech by women.                             |                 |                                        |
| 4. I find it difficult to identify the emotions of people speaking on television.                     |                 |                                        |
| 5. I have difficulty understanding emotions expressed in speech by young adults.                      |                 |                                        |
| 6. I find that people misinterpret my emotions (e.g. others think I am angry when I am not angry).    |                 |                                        |
| 7. I find that it is difficult to monitor the way my emotions come across in my speech.               |                 |                                        |
| 8. I find it difficult to convey my emotions about a subject in a subtle                              |                 |                                        |

|                                                                                                                                |  |  |
|--------------------------------------------------------------------------------------------------------------------------------|--|--|
| <b>manner using the tone of my voice.</b>                                                                                      |  |  |
| <b>9. I find that it is difficult to express my emotions about a topic out loud using the tone of my voice.</b>                |  |  |
| <b>10. It is harder for me to identify the emotions expressed by others when I'm in a noisy environment.</b>                   |  |  |
| <b>11. I find it challenging to identify emotions expressed by others when there is someone else talking at the same time.</b> |  |  |
| <b>12. Difficulties identifying emotions in speech make me feel left out when in groups.</b>                                   |  |  |
| <b>13. Difficulty identifying emotions expressed in speech causes me to feel uncomfortable when talking to friends.</b>        |  |  |
| <b>14. Difficulties identifying emotions expressed in speech cause me to feel sad.</b>                                         |  |  |
| <b>15. Difficulties understanding emotions expressed in speech cause me to feel frustrated.</b>                                |  |  |
| <b>16. My difficulty identifying emotions expressed in speech negatively affects my relationships with friends and family.</b> |  |  |
