# Supplementary material
Source: publisher figshare collection journal article supplement (https://asha.figshare.com/articles/dataset/_/24520624)
Supplement: Supplementary file 5 [file 1]

### Supplemental Material S3. Concepts of items.

| Original Version                                                                                                        | Concept Definition                                                                                         |
|-------------------------------------------------------------------------------------------------------------------------|------------------------------------------------------------------------------------------------------------|
| 1. I have difficulty identifying the emotions expressed by people I interact with on a regular basis.                   | To describe the emotions of people with whom they communicate in daily life.                               |
| 2. I have difficulty understanding emotions expressed in speech by men.                                                 | Variation of the speaker's ability to understand his/her emotions by gender.                               |
| 3. I have difficulty understanding emotions expressed in speech by women.                                               | Variation of the speaker's ability to understand his/her emotions by gender.                               |
| 4. I find it difficult to identify the emotions of people speaking on television.                                       | Ability to understand the emotions of the person speaking on television.                                   |
| 5. I have difficulty understanding emotions expressed in speech by young adults.                                        | Ability to understand young people's feelings in speech.                                                   |
| 6. I find that people misinterpret my emotions (e.g. others think I am angry when I am not angry).                      | Thinking about how others understand one's own feelings.                                                   |
| 7. I find that it is difficult to monitor the way my emotions come across in my speech.                                 | Difficulty controlling one's expressions of feelings while speaking.                                       |
| 8. I find it difficult to convey my emotions about a subject in a subtle manner using the tone of my voice.             | Difficulty expressing emotions by adjusting the tone of voice.                                             |
| 9. I find that it is difficult to express my emotions about a topic out loud using the tone of my voice.                | Difficulty expressing emotions by adjusting the tone of voice.                                             |
| 10. It is harder for me to identify the emotions expressed by others when I'm in a noisy environment.                   | Ability to understand the emotions of speakers in a noisy environment.                                     |
| 11. I find it challenging to identify emotions expressed by others when there is someone else talking at the same time. | Ability to understand emotions in an environment where more than one person is speaking.                   |
| 12. Difficulties identifying emotions in speech make me feel left out when in groups.                                   | The effect of difficulty in understanding the speaker's emotions on a person's mood.                       |
| 13. Difficulty identifying emotions expressed in speech causes me to feel uncomfortable when talking to friends.        | The effect of difficulty in understanding the speaker's emotions on a person's mood.                       |
| 14. Difficulties identifying emotions expressed in speech cause me to feel sad.                                         | The effect of difficulty in understanding the speaker's emotions on a person's mood.                       |
| 15. Difficulties understanding emotions expressed in speech cause me to feel frustrated.                                | The effect of difficulty in understanding the speaker's emotions on a person's mood.                       |
| 16. My difficulty identifying emotions expressed in speech negatively affects my relationships with friends and family. | The effect of difficulty in understanding the speaker's feelings on the environment of friends and family. |
